# Supplementary material
Source: PubMed Central journal article supplement (PMC6681653)
Supplement: jamaophthalmol-137-1134-s001.pdf [file jamaophthalmol-137-1134-s001.pdf]

## Supplementary Online Content

Strauss RW, Kong X, Ho A, et al; ProgStar Study Group. Progression of Stargardt disease as determined by fundus autofluorescence over a 12-month period: ProgStar report No. 11. *JAMA Ophthalmol*. Published August 1, 2019. doi:10.1001/jamaophthalmol.2019.2885

**eMethods 1.** Grading of atrophic lesions on fundus autofluorescence

**eMethods 2.** Statistical methods

**eReferences.**

**eTable.** Demographic characteristics at baseline visit of patients in the prospective ProgStar study

**eAppendix.** ProgStar study team

This supplementary material has been provided by the authors to give readers additional information about their work.

## **eMethods 1.** Grading of atrophic lesions on fundus autofluorescence

### *Grading of atrophic lesions on fundus autofluorescence*

De-identified images were sent from the participating sites to a central reading center (Doheny Imaging Reading Center; DIRC) where the images were graded by two independent graders including adjudication processes by a senior investigator where applicable as previously described in detail.<sup>1</sup> Images with insufficient quality (ungradable images) were excluded from analysis.

### *Qualitative parameter*

Background FAF was defined as either normal (homogeneous) or irregular (heterogeneous) as previously published:<sup>1,2</sup> a normal background FAF is characterized by an even, smooth distribution of FAF (homogeneous) with typical decrease at the fovea due to the presence of macular pigment, while any irregularities such as speckled, mottled or reticular patterns have been considered as irregular background FAF (heterogeneous).

Qualitative grading parameters included: the absence or presence of flecks both within and outside the arcades; presence of increased FAF at the edge of a lesion of decreased FAF (areas of increased autofluorescence were determined by comparison of the FAF of the region of interest to the background FAF); unifocal versus multifocal lesions at baseline. In addition, the presence of flecks outside the arcades was also assessed using information from clinical examination.

## eMethods 2. Statistical methods

Linear models with generalized estimating equations were used to estimate the associations of baseline DAF lesion areas with participant characteristics. Longitudinally, linear mixed models (LMM), with time as the independent variable, were used to estimate the yearly change for each outcome. The models include random effects for the intercept and the slope for time which take into account the potential correlation between eyes and the correlation between repeated measurements of the same eye. The rate of lesion area change associated with each variable was first estimated in an univariate analysis. Multivariate analysis was further run by including variables that were significantly associated with the rate of area change with  $p < 0.1$  in univariate analyses.

Exploratory inspection of lesion growth over time showed a strong dependency on lesion size at the first visit in the retrospective cohort of ProgStar.<sup>2</sup> For both DDAF and DAF lesion area, stratified analysis by lesion size at the first visit was performed for eyes with small lesions (i.e.,  $\leq 1.90 \text{ mm}^2$ ), eyes with intermediate lesions (sizes larger than  $1.9 \text{ mm}^2$  but  $\leq 5.0 \text{ mm}^2$ ) and eyes with large lesions ( $> 5.0 \text{ mm}^2$ ). All analyses were conducted using SAS 9.3, and p-values for two-sided tests are reported.

## eReferences.

1. Strauss RW, Ho A, Munoz B, et al. The Natural History of the Progression of Atrophy Secondary to Stargardt Disease (ProgStar) Studies: Design and Baseline Characteristics: ProgStar Report No. 1. *Ophthalmology*. 2016;123(4):817-828.
2. Strauss RW, Munoz B, Ho A, et al. Progression of Stargardt Disease as Determined by Fundus Autofluorescence in the Retrospective Progression of Stargardt Disease Study (ProgStar Report No. 9). *JAMA Ophthalmol*. 2017;135(11):1232-1241.

| <b>eTable 1: Demographic characteristics at baseline visit of patients in the prospective ProgStar study</b> |                                      |
|--------------------------------------------------------------------------------------------------------------|--------------------------------------|
| Characteristics                                                                                              |                                      |
| Number of participants                                                                                       | 259 (480 study eyes)                 |
| Age at first visit (mean (SD))                                                                               | 33.3 ( $\pm$ 15.1)                   |
| Age of onset of symptoms (mean(SD))*                                                                         | 22.3 ( $\pm$ 12.9; range 4.0-64.0)   |
| Age of onset $\leq$ 18 years                                                                                 | 46.5%                                |
| Age of onset > 18 years                                                                                      | 53.5%                                |
| Duration of disease until baseline visit (mean (SD))*                                                        | 11.66 ( $\pm$ 9.2; range 0-55 years) |
| Female                                                                                                       | 118 (54.4%)                          |
| Race                                                                                                         |                                      |
| White/Caucasian/M. Eastern                                                                                   | 222 (85.7%)                          |
| Black/African                                                                                                | 20 (7.7%)                            |
| Asian/Indian                                                                                                 | 10 (3.9%)                            |
| Other/Multiracial                                                                                            | 2 (1.2%)                             |
| Unknown                                                                                                      | 4 (1.5%)                             |
| Vitamin A supplementation                                                                                    | 14.3%                                |
| Former smoker                                                                                                | 11.2%                                |
| Current smoker                                                                                               | 13.5%                                |

\*missing for 18 patients

## **eAppendix. ProgStar Study Team**

*Required language to appear in the appropriate location of all publications using ProgStar (retrospective and prospective study) resources*

The ProgStar study is supported by a contract from the Foundation Fighting Blindness. The ProgStar studies consist of the Chair's Office, nine clinics, two resource centers, and two affiliated centers with the following members:

### **Chair's Office**

Hendrik P.N. Scholl, MD  
Rupert W. Strauss, MD  
Yulia Wolfson, MD  
Millena Bittencourt, MD  
Syed Mahmood Shah, MD  
Mohamed Ahmed, MD  
Etienne Schönbach, MD  
Kaoru Fujinami, MD, PhD

### **Cole Eye Institute, Cleveland**

Elias Traboulsi, MD  
Justis Ehlers, MD  
Meghan Marino, MS  
Susan Crowe, BS  
Rachael Briggs, COA  
Angela Borer, BS  
Anne Pinter, CRA  
Tami Fecko  
Nikki Burgnoni, MS

### **Greater Baltimore Medical Center, Towson**

Janet S. Sunness, MD  
Carol Applegate, MLA, COT  
Leslie Russell, MAC

### **Moorfields Eye Hospital, London**

Michel Michaelides, MD  
Simona Degli Esposti, MD  
Anthony Moore  
Andrew Webster, MD  
Sophie Connor, BSc  
Jade Barnfield, BA  
Zaid Salchi, MD  
Clara Alfageme, MD  
Victoria McCudden  
Maria Pefkianaki, MD  
Jonathan Aboshiha, MA, MB  
Gerald Liew  
Graham Holder, PhD  
Anthony Robson, PhD  
Alexa King, BA  
Daniela Ivanova Cajas Narvaez, MSc  
Katy Barnard, BS  
Catherine Grigg, BSc  
Hannah Dunbar, PhD  
Yetunde Obadeyi  
Karine Girard-Claudon, MST  
Hilary Swann, BSc

Avani Rughani, BSc  
Charles Amoah, NVQ  
Dominic Carrington  
Kanom Bibi, BSc  
Emerson Ting Co, DMD  
Mohamed Nafaz Illiyas  
Hamida Begum, BSc  
Andrew Carter, BSc  
Anne Georgiou, PhD  
Selma Lewism BSc  
Saddaf Shaheen, PGDip, BSc  
Harpreet Shinmar, MSc  
Linda Burton, BSc

**Moran Eye Center, Salt Lake City**

Paul Bernstein, MD, PhD  
Kimberley Wegner, BS  
Briana Lauren Sawyer, MS  
Bonnie Carlstrom, COA  
Kellian Farnsworth, COA  
Cyrie Fry, AS, CRA, OCT-C  
Melissa Chandler, BS, CRC, OCT-a  
Glen Jenkins, BS, COA, CRC, OCT-a  
Donnel Creel, PhD

**Retina Foundation of the Southwest, Dallas**

David Birch, PhD  
Yi-Zhong Wang, PhD  
Luis Rodriguez, BS  
Kirsten Locke, BS  
Martin Klein, MS  
Paulina Mejia, BS

**Scheie Eye Institute, Philadelphia**

Artur V. Cideciyan, PhD  
Samuel G. Jacobson, MD, PhD  
Sharon B. Schwartz, MS, CGC  
Rodrigo Matsui, MD  
Michaela Gruzensky, MD  
Jason Charng, OD, PhD  
Alejandro J. Roman, MS

**University of Tübingen, Tübingen**

Eberhart Zrenner, PhD  
Fadi Nasser, MD  
Gesa Astrid Hahn, MD  
Barbara Wilhelm, MD  
Tobias Peters, MD  
Benjamin Beier, BSc  
Tilman Koenig  
Susanne Kramer, Dipl. Biol.

**The Vision Institute, Paris**

José-Alain Sahel, MD  
Saddek Mohand-Said, MD, PhD  
Isabelle Audo, MD, PhD  
Caroline Laurent-Coriat, MD

Ieva Sliesoraityte, MD, PhD  
Christina Zeitz, PhD  
Fiona Boyard, BS  
Minh Ha Tran, BS  
Mathias Chapon, COT  
Céline Chaumette, COT  
Juliette Amaudruz, COT  
Victoria Ganem, COT  
Serge Sancho, COT  
Aurore Girmens, COT

**The Wilmer Eye Institute, Baltimore**

Hendrik P.N. Scholl, MD  
Rupert W. Strauss, MD  
Yulia Wolfson, MD  
Syed Mahmood Shah, MD  
Mohamed Ahmed, MD  
Etienne Schönbach, MD  
Robert Wojciechowski, PhD  
Shazia Khan, MD  
David G. Emmert, BA  
Dennis Cain, CRA  
Mark Herring, CRA  
Jennifer Bassinger, COA  
Lisa Liberto, COA

**Dana Center Data Coordinating Center**

Sheila K. West, PhD  
Ann-Margret Ervin, PhD  
Beatriz Munoz, MS  
Xiangrong Kong, PhD  
Kurt Dreger, BS  
Jennifer Jones, BA  
Robert Burke, BA

**Doheny Image Reading Center**

Srinivas Satta, MD  
Michael S. Ip, MD  
Anamika Jha, MBS  
Alex Ho, BS  
Brendan Kramer, BA  
Ngoc Lam, BA  
Rita Tawdros, BS  
Yong Dong Zhou, MD, PhD  
Johana Carmona, HS  
Akihito Uji, MD, PhD  
Amirhossein Hariri, MD  
Amy Lock, BS  
Anthony Elshafei, BS  
Anushika Ganegoda, BS  
Christine Petrossian, BS  
Dennis Jenkins, MPH  
Edward Strnad, BS  
Elmira Baghdasaryan, MD  
Eric Ito, OD  
Feliz Samson, BS  
Gloria Blanquel, BS

Handan Akil, MD, FEBOpt  
Jhanisus Melendez, MS  
Jianqin Lei, MD  
Jianyan Huang, MD, PhD  
Jonathan Chau, BS  
Khalil G. Falavarjani, MD  
Kristina Espino, BS  
Manfred Li, BS  
Maria Mendoza, BS  
Muneeswar Gupta Nittala, MPhil Opt  
Netali Roded, BS  
Nizar Saleh, MD  
Ping Huang, MD, PhD  
Sean Pitetta, BS  
Siva Balasubramanian, MD, PhD  
Sophie Leahy, BA  
Sowmya J. Srinivas, MBBS  
Swetha B. Velaga, B Opt  
Teresa Margaryan, BA  
Tudor Tepelus, PhD  
Tyler Brown, BS  
Wenying Fan, MD  
Yamileth Murillo, BA  
Yue Shi, MD, PhD  
Katherine Aguilar, BS  
Cynthia Chan, BS  
Lisa Santos, HS  
Brian Seo, BA  
Christopher Sison, BS  
Silvia Perez, BS  
Stephanie Chao, HS  
Kelly Miyasato, MPH  
Julia Higgins, MS  
Zoila Luna, MHA  
Anita Menchaca, BS  
Norma Gonzalez, MA  
Vicky Robledo, BS  
Karen Carig, BS  
Kirstie Baker, HS  
David Ellenbogen, BS  
Daniel Bluemel, AA  
Theo Sanford, BS  
Daisy Linares, HS  
Mei Tran, BA  
Lorane Nava, HS  
Michelle Oberoi, BS  
Mark Romero, HS  
Vivian Chiguil, HS  
Grantley Bynum-Bain, BA  
Monica Kim, BS  
Carolina Mendiguren, MEM  
Xiwen Huang, MPH  
Monika Smith, HS
